# Disease and climate effects on individuals jointly drive post-reintroduction population dynamics of an endangered amphibian

Maxwell B. Joseph<sup>\*1, 3</sup> and Roland A. Knapp<sup>†2, 3</sup>

<sup>1</sup>Earth Lab, University of Colorado, Boulder, CO 80303, USA

<sup>2</sup>Sierra Nevada Aquatic Research Laboratory, University of California, Mammoth Lakes, CA 93546, USA

<sup>3</sup>These authors contributed equally to this work.

---

\*maxwell.b.joseph@colorado.edu

†roland.knapp@ucsb.edu

## Abstract

The emergence of novel pathogens often has dramatic negative effects on previously unexposed host populations. Subsequent disease can drive populations and even species to extinction. After establishment in populations, pathogens can continue to affect host dynamics, influencing the success or failure of species recovery efforts. However, quantifying the effect of pathogens on host populations in the wild is challenging because individual hosts and their pathogens are difficult to observe. Here we use long-term mark-recapture data to describe the dynamics of reintroduced populations of an endangered amphibian (*Rana sierrae*) and evaluate the success of these recovery efforts in the presence of a recently-emerged pathogen, the amphibian chytrid fungus *Batrachochytrium dendrobatidis*. We find that high *B. dendrobatidis* infection intensities are associated with increases in detectability, reductions in survival, and more infected adults. We also find evidence for intensity-dependent survival, with heavily infected individuals suffering higher mortality. These results highlight the need in disease ecology for probabilistic approaches that account for uncertainty in infection intensity using imperfect observational data. Such approaches can advance the understanding of disease impacts on host population dynamics, and in the current study will improve the effectiveness of species conservation actions.

**Key words:** *Batrachochytrium dendrobatidis*; host-pathogen dynamics; mark-recapture; mountain yellow-legged frog; population establishment; recruitment; reintroduction; survival.

## Introduction

Amphibians are one of the most threatened groups of vertebrates (Wake and Vredenburg 2008). Although the drivers of amphibian decline vary taxonomically and spatially, the

26 amphibian chytrid fungus *Batrachochytrium dendrobatidis* (Bd) is a major cause of  
27 population declines and species extinctions in montane habitats worldwide (Skerratt  
28 et al. 2007, Fisher et al. 2009, Grant et al. 2016). In the face of these declines, species  
29 recovery will often require introductions to restore extirpated populations, but little is  
30 known about the dynamics of population establishment and persistence of threatened  
31 amphibians (Armstrong and Seddon 2008), especially in the presence of disease. Given  
32 Bd's role in eliminating populations, we expect introduction outcomes to be shaped by  
33 disease impacts on demographic rates, but measuring such impacts in wild populations is  
34 difficult (McCallum and Dobson 1995, Briggs et al. 2010).

35 The mountain yellow-legged frog is emblematic of global amphibian declines. Although  
36 formerly abundant in the relatively protected habitats of California's Sierra Nevada  
37 mountains (USA), the two species that make up this taxon (*Rana muscosa* and *Rana*  
38 *sierrae* (Vredenburg et al. 2007)) have disappeared from over 93% of historical localities,  
39 due primarily to the introduction of nonnative fish into fishless habitats (Knapp and  
40 Matthews 2000, Knapp 2005) and the emergence of Bd (Vredenburg et al. 2010). In  
41 response, both species are listed as "endangered" under the U.S. Endangered Species  
42 Act and included on the International Union for Conservation of Nature Red List of  
43 Threatened Species (IUCN 2017). *R. sierrae* has shown recent signs of recovery in the  
44 best-protected portion of its range, including Yosemite National Park, but due to dispersal  
45 limitations the re-establishment of populations may require introductions in addition to  
46 natural recovery (Knapp et al. 2016). The effectiveness of such actions remains unclear,  
47 and the drivers of post-introduction population dynamics and introduction success or  
48 failure are poorly understood.

49 Introduction outcomes may be described in terms of survival, recruitment, and abundance  
50 trajectories. Mark-recapture studies provide a method to estimate these quantities in  
51 wild populations while accounting for factors that can complicate inference, including

52 imperfect detection (Jolly 1965, Pradel 1996), multiple classes within the population  
53 that may be imperfectly resolved (Lebreton and Cefe 2002, Conn and Cooch 2009), and  
54 incompletely observed individual-level traits (Royle 2009). This flexibility is critical for  
55 understanding disease impacts in wild populations. Multi-state mark-recapture methods  
56 have been applied with great success to understand the population-level impacts of Bd,  
57 and differences in demographic rates between infected and uninfected classes (Murray et al.  
58 2009, Pilliod et al. 2010, Sapsford et al. 2015, Hudson et al. 2016).

59 Assuming that survival depends only on whether an individual is infected, and not  
60 considering infection intensity (i.e., load), could be problematic given that Bd-caused  
61 frog mortality is often a function of load (Briggs et al. 2010). However, individual-level  
62 infection data are often not available. For example, Bd load may not be observed if an  
63 individual is not encountered or captured on a survey, or if they are captured but no  
64 infection data are collected. This presents a major challenge: infection intensity is hard  
65 to measure, but may be critical for understanding population dynamics. Previous efforts  
66 to understand disease impacts in wild populations as a function of load at the individual  
67 level have randomly imputed missing infection load data with the observed distribution of  
68 load values (Spitzen-van der Sluijs et al. 2017). However, random imputation could bias  
69 inference if load data are not missing at random, for example, if load-dependent disease  
70 affects detection.

71 In this paper, we use a Bayesian multi-state model with data from decade-long  
72 mark-recapture studies in two reintroduced frog populations to understand the influence  
73 of disease and climate on introduction outcomes. We find that disease dynamics affect  
74 introduction success, with high infection intensities leading to more infected adults,  
75 a reduction in adult survival, and adults that are easier to detect. Recruitment and  
76 uninfected adult survival are also important for population persistence. Differential  
77 detectability of adults related to infection intensity points to broader questions about

78 understanding disease impacts in wild populations, and highlights the importance of  
79 understanding hidden infection dynamics at the individual level. These insights will inform  
80 ongoing and future efforts aimed at restoring the endangered mountain yellow-legged frog,  
81 and provide a means to quantitatively assess why some introduction efforts fail and others  
82 succeed.

## 83 **Methods**

### 84 **Field sites and methods**

85 The two study lakes are located in eastern Yosemite National Park (California, USA)  
86 at elevations of 2880 and 3200 m. *R. sierrae* populations in both lakes were established  
87 via translocation from a single nearby donor population (elevation: 3176 m). The donor  
88 population has been Bd-positive for at least two decades (Fellers et al. 2001), and contains  
89 one of the largest *R. sierrae* populations in Yosemite (minimum population size during  
90 this study: 600-1500 adults). The introduction lakes are located 5.5-7.0 km from the donor  
91 population and both contain high quality *R. sierrae* habitat (i.e., fishless, 6-12 m deep,  
92 with adjacent meadow and stream habitats) (Knapp 2005). Because these lakes harbor a  
93 sensitive species, we refer to them by the pseudonyms Alpine and Subalpine (Lindenmayer  
94 and Scheele 2017). Visual encounter surveys (Knapp 2005) conducted just prior to the  
95 first introductions indicated that both lakes lacked *R. sierrae* of any life stage. Prior to  
96 introduction, adult frogs ( $\geq 40$  mm snout-vent length (SVL)) were captured at the donor  
97 site, and tagged (8mm passive integrated transponder (PIT) tags), measured, and weighed.  
98 To estimate Bd load, we also collected a skin swab from each frog using standard methods  
99 (Hyatt et al. 2007, Vredenburg et al. 2010).

100 The initial introduction of frogs to Alpine and Subalpine occurred during summer 2006  
101 and 2008, respectively, and additional introductions to supplement both populations

102 were conducted in subsequent years. In the first introduction to Alpine, frogs were  
103 transported on foot; in all subsequent introductions to both Alpine and Subalpine, frogs  
104 were transported via helicopter (Table 1).

105 To describe the dynamics of the introduced populations, both populations were assessed  
106 for 10-12 years using mark-recapture methods. Between 2006 and 2012, lakes were visited  
107 approximately once per month during the summer active season (June-September) and on  
108 a single day (primary period) all habitats were searched repeatedly for frogs which were  
109 captured using hand-held nets. Adult frogs were identified via their PIT tag (or tagged if  
110 they were untagged), measured, weighed, swabbed, and released at the capture location.  
111 During 2013-2017, we adopted a robust design in which all habitats were searched during  
112 several consecutive days (surveys), and frogs processed as described above. Within  
113 a primary period, frogs that were captured on more than one survey were measured,  
114 weighed, and swabbed only when first captured.

115 Skin swabs were analysed using standard Bd DNA extraction and qPCR methods (Boyle  
116 et al. 2004) except that swab extracts were analyzed singly instead of in triplicate (Kriger  
117 et al. 2006, Vredenburg et al. (2010)). During 2005-2014, we used standards developed  
118 from known concentrations of zoospores (Boyle et al. 2004) and after 2014 we used  
119 standards based on single ITS1 PCR-amplicons (Longo et al. 2013). Based on paired  
120 comparisons between samples analyzed using both types of standards, Bd in the study  
121 area has an average of 60 ITS1 copies per zoospore. To express all qPCR results as  
122 the number of ITS1 copies, starting quantities obtained using the zoospore standard  
123 (measured as “zoospore equivalents”) were multiplied by 60. In addition, all qPCR  
124 quantities (regardless of standard) were multiplied by 80 to account for the fact that DNA  
125 extracts from swabs were diluted 80-fold during extraction and PCR (Vredenburg et al.  
126 2010).

127 We acquired hourly air temperature and daily snow depth data from two nearby

128 meteorological stations (ERY and DAN, respectively) and snow water equivalent data  
129 from a manually-measured snow course (DAN; California Data Exchange Center -  
130 <http://cdec.water.ca.gov>). The stations and snow course are 5-17 km from the study  
131 lakes. We used snow water equivalent as measured on April 1 of each year as a measure  
132 of winter severity, to be used as a covariate for frog recruitment and survival. Daily snow  
133 depth data were acquired to model survey occurrence as described below. To better  
134 understand the detection process, we averaged hourly air temperature data collected  
135 between 0900-1600 on each day a survey took place, to derive a “survey air temperature”  
136 metric.

## 137 **Model development**

138 We developed a hierarchical Bayesian hidden Markov model to understand how  
139 environmental factors and partly observed time-varying individual traits (Bd loads) jointly  
140 drive population dynamics. This model also needed to account for the partly deterministic  
141 recruitment process that arises with introductions. The result is an extended open  
142 population Jolly-Seber mark-recapture model with known additions to the population  
143 (introduced adults), continuous uncertain disease states of individuals which may or may  
144 not be captured, and sampling that is unevenly distributed in time.

145 In a small number of cases, adults were captured, weighed, and measured, but no swab  
146 data were associated with the capture (e.g., if a swab was lost). In these cases (3% of  
147 2697 swabs), capture data indicate that the adult was alive during the survey, but its  
148 infection status is unknown. As such, there are three possible observations for captured  
149 frogs: detected/infected, detected/uninfected, and detected/unknown infection status.  
150 A fourth possible observation class corresponds to non-detection: an individual was not  
151 observed during a survey.

## 152 Mark-recapture model structure

153 We consider four possible observations for each individual  $i = 1, \dots, M$  on each survey  
154  $j = 1, \dots, n_j$ :  $o_{i,j} = 1$  indicates that the individual was not detected;  $o_{i,j} = 2$  indicates that  
155 the individual was observed and the swab collected for that individual indicated that they  
156 were uninfected;  $o_{i,j} = 3$  indicates that the individual was observed and results from the  
157 collected swab showed that the frog had a non-zero Bd load; and  $o_{i,j} = 4$  indicates that  
158 the individual was observed, but no swab data were available from the capture.

159 We use parameter-expanded data augmentation to account for the fact that the total  
160 number of adults in the population is unknown (Royle and Dorazio 2012). Across the  
161 entire time period of the study, we assume  $N_s$  individuals have existed in the population,  
162 comprising the superpopulation of individuals that were present at some time. While  $N_s$   
163 is not directly observable, across all surveys  $n \leq N_s$  unique individuals were known to be  
164 present in the population (because they were introduced and/or captured). An estimate of  
165  $N_s$  can be acquired by considering a large number  $M > N_s$  of individuals,  $M - N_s$  of which  
166 never existed (Royle 2009). Thus, the model has a state corresponding to individuals  
167 that have not recruited yet. Here,  $M$  was chosen to be 2218 at Alpine (618 observed  
168 unique individuals plus 1600 augmented individuals), and 558 at Subalpine (158 observed  
169 individuals, and 400 augmented individuals). These values were chosen to be considerably  
170 greater than our prior guess of  $N_s$ , and we also verified that posterior estimates of  $N_s$  were  
171 much less than  $M$  to avoid problems on the boundary of this augmented parameter space  
172 (Dennis et al. 2015).

173 We denote the true state of individual  $i$  in primary period  $t$  as  $u_{i,t}$ , for every individual  
174  $i = 1, \dots, M$  and each primary period  $t = 1, \dots, n_t$ . The four states that we consider are:  
175  $u_{i,t} = 1$  for individuals that have not recruited,  $u_{i,t} = 2$  for uninfected adults,  $u_{i,t} = 3$   
176 for infected adults, and  $u_{i,t} = 4$  for dead individuals. Each survey  $j = 1, \dots, n_j$  occurs in  
177 one of the  $n_t$  primary periods, and we denote the primary period in which survey  $j$  takes



178 place as  $t_j$ . Each primary period  $t$  occurs within one year, but within a year there are  
 179 multiple primary periods. We set the year containing the first primary period to  $y_{t=1} = 1$ ,  
 180 and generally  $y_t$  represents the year containing primary period  $t$ . Years increment by one  
 181 until the final year of the mark recapture efforts, which we denote  $n_y$ :  $y \in \{1, 2, \dots, n_y\}$ .  
 182 We assume that within a primary period, the state of each individual does not change  
 183 (i.e., individuals do not recruit into the adult population, gain or lose Bd infection, or die).  
 184 This assumption is justified by the short time intervals between surveys within primary  
 185 periods.

## 186 Observation model

187 An emission matrix  $\Omega_{i,j}$  links observations to hidden states, with the elements of  $\Omega_{i,j}$   
 188 providing the probability of each possible observation of individual  $i$  in survey  $j$ , given  
 189 the true hidden state. The rows in  $\Omega_{i,j}$  correspond to the state of individual  $i$  in primary  
 190 period  $t_j$ , and the columns correspond to an observation of individual  $i$  in survey  $j$ :

$$\Omega_{i,j} = \begin{array}{cccc}
 \text{Not detected} & \text{Bd negative} & \text{Bd positive} & \text{Bd unknown} \\
 o_{i,j} = 1 & o_{i,j} = 2 & o_{i,j} = 3 & o_{i,j} = 4 \\
 \left( \begin{array}{cccc}
 1 & 0 & 0 & 0 \\
 1 - p_{i,j}^- & p_{i,j}^- \delta & 0 & p_{i,j}^- (1 - \delta) \\
 1 - p_{i,j}^+ & 0 & p_{i,j}^+ \delta & p_{i,j}^+ (1 - \delta) \\
 1 & 0 & 0 & 0
 \end{array} \right) & \begin{array}{l}
 \text{Not recruited} \\
 u_{i,t_j} = 1 \\
 \text{Uninfected} \\
 u_{i,t_j} = 2 \\
 \text{Infected} \\
 u_{i,t_j} = 3 \\
 \text{Dead} \\
 u_{i,t_j} = 4
 \end{array}
 \end{array}$$

191 The structure of  $\Omega_{i,j}$  implies that there are no mistaken individual identifications (those

192 that are dead or not recruited are never detected), and that a swab successfully makes it  
 193 to the lab and provides qPCR data with probability  $\delta$ , conditional on the animal being  
 194 detected. Detection probabilities are provided by  $p_{i,j}^-$  for uninfected (Bd negative) and  
 195  $p_{i,j}^+$  for infected (Bd positive) individuals, and these detection probabilities can vary by  
 196 individual and survey. We also assume that there are no false-positive or false-negative Bd  
 197 results (Hyatt et al. 2007), though relaxing this assumption may be a promising future  
 198 area, given the potential sensitivity of swab results to infection intensity (Miller et al.  
 199 2012).

## 200 State model

201 The hidden states of each individual evolve as a Markov process with transition matrix  
 202  $\Psi_{i,t}$ , the entries of which provide the probability of transitioning to state  $u_{i,t+1}$  (the  
 203 column index) from state  $u_{i,t}$  (the row index). This matrix is different for individuals  
 204 that naturally recruit versus those that recruit deterministically due to introduction. For  
 205 naturally recruiting individuals:

$$\Psi_{i,t} = \begin{array}{c} \begin{array}{cccc} \text{Not recruited} & \text{Uninfected} & \text{Infected} & \text{Dead} \\ u_{i,t+1} = 1 & u_{i,t+1} = 2 & u_{i,t+1} = 3 & u_{i,t+1} = 4 \end{array} \\ \left( \begin{array}{cccc} 1 - \lambda_t & \lambda_t(1 - \gamma_t) & \lambda_t\gamma_t & 0 \\ 0 & \phi_{i,t}^-(1 - \eta_t^+) & \phi_{i,t}^-\eta_t^+ & 1 - \phi_{i,t}^- \\ 0 & \phi_{i,t}^+\eta_t^- & \phi_{i,t}^+(1 - \eta_t^-) & 1 - \phi_{i,t}^+ \\ 0 & 0 & 0 & 1 \end{array} \right) \begin{array}{c} \text{Not recruited} \\ u_{i,t} = 1 \\ \text{Uninfected} \\ u_{i,t} = 2 \\ \text{Infected} \\ u_{i,t} = 3 \\ \text{Dead} \\ u_{i,t} = 4 \end{array} \end{array}$$

206 where  $\lambda_t$  is the probability that an individual enters the adult population between primary  
 207 periods  $t$  and  $t + 1$ ,  $\gamma_t$  is the probability that a recruiting individual is infected conditional  
 208 on entry,  $\phi_{i,t}^-$  is a survival probability for an uninfected adult,  $\phi_{i,t}^+$  is a survival probability  
 209 for an infected adult,  $\eta_t^+$  is the probability of transitioning from the uninfected to infected  
 210 class conditional on survival, and  $\eta_t^-$  is the probability of transitioning from the infected to  
 211 uninfected class conditional on survival.

212 For introduced individuals, the recruitment process is deterministic. Specifically, for each  
 213 introduced adult, there is zero chance that they recruit prior to the primary period in  
 214 which they are introduced, and if they are introduced at time  $t^{\text{intro}}_i$ , then the probability  
 215 that they recruit into a particular class (their state upon introduction) must be one.  
 216 For these introductions, all introduced adults were infected, and thus recruited into the  
 217 infected adult class, leading to the following transition matrix for introduced animals,  
 218 where the recruitment process is completely determined by  $t^{\text{intro}}_i$ , such that  $\Psi_{i,t}$  is:

$$\begin{array}{cccc}
 \text{Not recruited} & \text{Uninfected} & \text{Infected} & \text{Dead} \\
 u_{i,t+1} = 1 & u_{i,t+1} = 2 & u_{i,t+1} = 3 & u_{i,t+1} = 4 \\
 \left( \begin{array}{cccc}
 1 - I_{(t=(t^{\text{intro}}_i-1))} & 0 & I_{(t=(t^{\text{intro}}_i-1))} & 0 \\
 0 & \phi_{i,t}^-(1 - \eta_t^+) & \phi_{i,t}^-\eta_t^+ & 1 - \phi_{i,t}^- \\
 0 & \phi_{i,t}^+\eta_t^- & \phi_{i,t}^+(1 - \eta_t^-) & 1 - \phi_{i,t}^+ \\
 0 & 0 & 0 & 1
 \end{array} \right) & \begin{array}{l}
 \text{Not recruited} \\
 u_{i,t} = 1 \\
 \text{Uninfected} \\
 u_{i,t} = 2 \\
 \text{Infected} \\
 u_{i,t} = 3 \\
 \text{Dead} \\
 u_{i,t} = 4
 \end{array}
 \end{array}$$

219 where  $I_{(t=(t^{\text{intro}}_i-1))}$  is an indicator function equal to one when  $t$  is equal to  $t^{\text{intro}}_i - 1$ .

220 An imaginary first primary period augments the collection of primary periods when  
221 introductions took place and when surveys occurred, and was set to occur one week  
222 before the initial introductions into each population. For this augmented period  $t = 1$ ,  
223 we assume that all individuals are in the “not-recruited” class,  $u_{i,1} = 1$  for  $i = 1, \dots, M$   
224 (Figure 1). Given that neither lake was known to contain adult frogs immediately prior to  
225 introduction, this is potentially a fair assumption, but in case the assumption was violated  
226 and adults were present prior to the introduction, we include a time-varying adjustment  
227 into the recruitment model (described below).

228 The number of primary periods was not uniform across survey years, and as such, the  
229 time between primary periods was also heterogeneous, complicating the interpretation  
230 of transition probabilities. Thus, at both sites, we used augmented primary periods to  
231 increase the regularity of time intervals between primary periods. These were chosen to  
232 occur when primary periods might have occurred, e.g., not during the winter months when  
233 the lakes are snow-covered, using a statistical model of when surveys are conducted. At  
234 each site, we fit a binomial generalized additive model with thin plate spline smoothers  
235 for day-of-year and daily snow depth at Dana Meadows, where the response variable was  
236 zero or one for each day, with one indicating that a survey took place. These models were  
237 fit using the `gam` function in the `mgcv` package in the R programming language (R Core  
238 Team 2017, Wood 2017). Then, we predicted new values from these models, with the  
239 goal of augmenting the set of primary periods for each year at each site until all years  
240 except the first and last had the same number of primary periods (the maximum number  
241 of primary periods within one year at each site: ten at Alpine and eight at Subalpine).  
242 Augmented primary periods were only accepted if there was no primary period within five  
243 days (before and after) of the proposed augmented primary period. The end result is a set  
244 of primary periods that are more uniformly distributed in time than the original collection  
245 of empirical primary periods, though these augmented primary periods are not associated  
246 with real surveys.

## 247 **Parameter model**

### 248 **Detection probabilities**

249 Among uninfected adult frogs, we assume that the probability of detection varies with  
250 survey air temperature (Sinsch 1984), so that

$$\text{logit}(p_{i,j}^-) = \alpha^{(p)} + \beta^{(p,x)} x_j,$$

251 where  $\alpha^{(p)}$  is an intercept parameter,  $\beta^{(p,x)}$  is the effect of survey air temperature on  
252 detection probability, and  $x_j$  is the survey air temperature for survey  $j$ , for all  $i, j$ . Among  
253 infected adult frogs, the detection model was expanded to allow for an adjustment to  
254 account for being infected, and a further adjustment to deal with variation due to Bd load:

$$\text{logit}(p_{i,j}^+) = \alpha^{(p)} + \beta^{(p,x)} x_j + \beta^{(p,+)} + \beta^{(p,z)} z_{i,t_j},$$

255 where  $\beta^{(p,+)}$  is the adjustment on the intercept for infected adults, and  $\beta^{(p,z)}$  is a coefficient  
256 for the log Bd load  $z_{i,t_j}$  of individual  $i$  in primary period  $t$  containing survey  $j$ , for all  $i, j$ .

### 257 **Recruitment probabilities**

258 The recruitment model was designed to account for annual variation in Bd loads, whether  
259 primary periods spanned years, and winter severity. For the probability of entering the  
260 population between primary period  $t$  and  $t + 1$ , we have:

$$\text{logit}(\lambda_t) = \alpha^{(\lambda)} + \beta^{(\lambda,w)} w_t + \beta^{(\lambda,s)} s_{y_t} + \beta^{(\lambda,1)} I_{(t=1)} + \epsilon_{y_t}^{(\lambda)},$$

261 where  $\alpha^{(\lambda)}$  is an intercept term, and the effect of an overwinter transition is represented  
262 as  $\beta^{(\lambda,w)}$ , with  $w_t$  as a binary indicator of whether a transition from period  $t$  to  $t + 1$

263 spans a winter (or equivalently, two years). The effect of the previous winter's severity  
264 is  $\beta^{(\lambda,s)}$ , where  $s_{y_t}$  is previous winter's severity. The parameter  $\beta^{(\lambda,1)}$  is an adjustment for  
265 the recruitment probability after the first imaginary primary period, which could account  
266 for undetected individuals present prior to introduction. Finally,  $\epsilon_{y_t}^{(\lambda)}$  is an adjustment  
267 to account for extra annual variation. The probability that an individual is infected,  
268 conditional on recruitment is modeled as a function of expected Bd load among infected  
269 adults:

$$\text{logit}(\gamma_t) = \alpha^{(\gamma)} + \beta^{(\gamma,\mu)} \mu_{y_t} + \epsilon_{y_t}^{(\gamma)},$$

270 where  $\alpha^{(\gamma)}$  is an intercept,  $\beta^{(\gamma,\mu)}$  represents the effect of mean Bd load among infected  
271 adults in the year containing primary period  $t$  (denoted  $\mu_{y_t}$ ), and  $\epsilon_{y_t}^{(\gamma)}$  is a year-specific  
272 adjustment.

### 273 Survival probabilities

274 Survival of uninfected adults was modeled as a function of whether a transition spanned  
275 an overwinter period and winter severity:

$$\text{logit}(\phi_{i,t}^-) = \alpha^{(\phi^-)} + \beta^{(\phi^-,w)} w_t + \beta^{(\phi^-,s)} s_{y_t} + \epsilon_{y_t}^{(\phi^-)},$$

276 where  $\alpha^{(\phi^-)}$  is an intercept parameter,  $\beta^{(\phi^-,w)}$  is an adjustment for overwinter transitions,  
277  $\beta^{(\phi^-,s)}$  is a coefficient for winter severity, and  $\epsilon_{y_t}^{(\phi^-)}$  is a year-specific adjustment. The  
278 survival probabilities for infected adults were similarly modeled, but with additional effects  
279 of individual Bd load:

$$\text{logit}(\phi_{i,t}^+) = \alpha^{(\phi^+)} + \beta^{(\phi^+,w)} w_t + \beta^{(\phi^+,s)} s_{y_t} + \beta^{(\phi^+,z)} z_{i,t} + \epsilon_{y_t}^{(\phi^+)},$$

280 where  $z_{i,t}$  is the log transformed Bd load of individual  $i$  during primary period  $t$ ,  $\beta^{(\phi^+,z)}$   
281 is a coefficient for Bd load, and the remainder of parameters are defined using the same  
282 notation as for the survival of uninfected adults.

### 283 **Loss and gain of infection probabilities**

284 The probability that an infected adult loses infection was modeled as a function of mean  
285 Bd load in the infected population, and whether a transition occurred from one year to the  
286 next:

$$\text{logit}(\eta_t^-) = \alpha^{(\eta^-)} + \beta^{(\eta^-,\mu)} \mu_{y_t} + \epsilon_{y_t}^{(\eta^-)},$$

287 where  $\alpha^{(\eta^-)}$  is an intercept,  $\beta^{(\eta^-,\mu)}$  is the effect of expected Bd load among infected adults,  
288 and  $\epsilon_{y_t}^{(\eta^-)}$  is a year-specific adjustment. Transitions from the uninfected to infected class  
289 were modeled similarly:

$$\text{logit}(\eta_t^+) = \alpha^{(\eta^+)} + \beta^{(\eta^+,\mu)} \mu_{y_t} + \epsilon_{y_t}^{(\eta^+)}$$

290 where parameter notation conventions and definitions match those for transitions from the  
291 infected to uninfected classes.

### 292 **Bd loads**

293 The fact that individuals are imperfectly detected, and that occasionally, individuals  
294 are detected but no disease information is recorded presents a challenge for including  
295 individual-level Bd loads in the model. Within the infected population, Bd loads are  
296 partially observed when individuals are captured and swabs are collected. We used a  
297 normal distribution to represent (potential) log Bd loads:

$$[\mathbf{Z}|\mu, \sigma] = \prod_{i=1}^M \prod_{t=1}^{n_t} \text{Normal}(z_{i,t}|\mu_{y_t}, \sigma)$$

298 When the load of individual  $i$  during primary period  $t$  was observed, this specifies a  
299 likelihood. Otherwise, this specifies a prior distribution for the potential log load of  
300 individual  $i$  on primary period  $t$ , conditional on infection. The expected value of Bd  
301 load among infected adults was assumed to vary among years, and potentially vary as a  
302 function of winter severity:

$$[\mu|\alpha^{(\mu)}, \beta^{(\mu)}, \sigma^{(\mu)}] = \prod_{y=1}^{n_y} \text{Normal}(\mu_y|\alpha^{(\mu)} + \beta^{(\mu)}s_y, \sigma^{(\mu)})$$

### 303 **Prior distributions**

304 Based on knowledge of the observation process, we expected that most captures  
305 resulted in a non-missing swab result, leading to the specification for the prior on  
306  $\delta$  as  $[\delta] = \text{Beta}(\delta|9, 1)$ . Annual adjustments were modeled using zero-mean normal  
307 distributions with unknown standard deviations specific to the process of interest, e.g., for  
308 the probability of entering the population:  $[\epsilon^{(\lambda)}] = \prod_{y=1}^{n_y} \text{Normal}(\epsilon_y^{(\lambda)}|0, \sigma^{\epsilon^{(\lambda)}})$ . Standard  
309 deviation parameters were given half normal priors i.e.,  $[\sigma^{\epsilon^{(\lambda)}}] = \text{Normal}_+(\sigma^{\epsilon^{(\lambda)}}|0, 1.5)$ ,  
310 and all remaining parameters were given  $\text{Normal}(0, 1.5)$  priors. The full factorization of  
311 the joint distribution of data and parameters is provided in Appendix A: Joint distribution  
312 factorization.

### 313 **Parameter estimation**

314 We implemented the model in Stan, a probabilistic programming language, and sampled  
315 from the approximate posterior distribution of parameters with automatic differentiation  
316 variational inference (Kucukelbir et al. 2015, Carpenter et al. 2016). We used the forward  
317 algorithm (Zucchini et al. 2016) to circumvent the need to sample from the discrete



318 space of true individual states (see Appendix B: Forward algorithm description for  
319 details). Variational inference uses a simple family of distributions as an approximation  
320 of the posterior distribution, optimizing parameters of this simpler approximation  
321 (the variational distribution) to minimize the Kullback-Leibler divergence between  
322 the true posterior and the variational distribution. A variational approximation was  
323 necessary for the models to run in a reasonable amount of time ( $\approx 2 - 4$  hours) on finite  
324 resources (r4.2xlarge EC2 instances on Amazon Web Services, with 8 virtual CPUs and  
325 61 GiB RAM). To verify our model implementation, we simulated data with known  
326 parameters from the model to evaluate parameter recovery, and check that parameters  
327 were identifiable. These simulations allowed us to identify a lack of identifiability in  
328 an earlier model specification which included multiplicative interaction terms between  
329 winter severity and Bd load for both the probability of entering the population, and the  
330 probability that new adults were infected conditional on recruitment.

331 All code and data necessary to reproduce the analysis and manuscript is publicly  
332 available at <https://www.github.com/snar11/sierra-reintroduction-cmr> (Joseph and  
333 Knapp 2018). The workflow is wrapped into GNU Make command (Stallman et al.  
334 2004), the manuscript is written in R Markdown (Allaire et al. 2018), and we used the  
335 R programming language (R Core Team 2017) with the `assertthat`, `ggrepel`, `ggridges`,  
336 `ggthemes`, `lubridate`, `mgcv`, `patchwork`, `reshape2`, `rstan`, and `tidyverse` packages to facilitate  
337 data processing, model fitting, and visualization (Wood 2004, Wickham 2007, 2017a,  
338 2017b, Grolemund and Wickham 2011, Stan Development Team 2016, Pedersen 2017,  
339 Slowikowski 2017, Arnold 2018, Wilke 2018). The computational environment with these  
340 dependencies is containerized via Docker, and the Dockerfile for the image exists in the  
341 GitHub repository for this project (Boettiger 2015).

## 342 Results

343 At both sites, infected adults were easier to detect than uninfected adults, and detection  
344 probabilities also increased with survey air temperature (Figure 2A). For a survey with  
345 an air temperature of 17 °C, the estimated probability of detecting an uninfected adult  
346 at Alpine was 0.157 (0.15, 0.163; posterior median and 90% CI), but for an infected  
347 adult with average Bd load, the probability of detection was 0.324 (0.306, 0.34). At  
348 Subalpine, for a survey with the same air temperature, the probability of detecting an  
349 uninfected adult was 0.19 (0.17, 0.211), but the probability of detecting an infected  
350 adult with an average Bd load was 0.598 (0.551, 0.646). Among infected adults, there  
351 was evidence for additional increases in detectability with increases in Bd load in the  
352 Alpine population (posterior median for  $\beta^{(p,z)}$ : 0.107, 90% CI: 0.086, 0.129) but not in the  
353 Subalpine population ( $\beta^{(p,z)}$ : 0.001, 90% CI: -0.056, 0.053) (Figure 2B).

354 Despite the two study populations being 12 km apart, mean Bd loads among infected  
355 adults varied synchronously between populations. After initial introduction in 2006 or  
356 2008, mean loads at both sites were typically between 1,000 and 10,000 copies, with  
357 a reduction in mean Bd load during the year following the first introduction (Figure  
358 3). Thereafter, loads were relatively low and stable through 2012. At both sites mean  
359 loads were uncharacteristically low in 2013 but increased in subsequent years until  
360 reaching a peak in 2016. Mean Bd loads at Subalpine tended to be higher than at Alpine,  
361 particularly in the period from 2015 - 2017. The estimated correlation over time between  
362 mean log Bd loads at the two study sites was 0.636 (0.315, 0.861). This correlation was  
363 not due to a shared response to winter severity because winter severity did not influence  
364 Bd load at either site (at Alpine  $\beta^{(\mu)}$ : -0.12 (-0.604, 0.37), at Subalpine  $\beta^{(\mu)}$ : -0.022  
365 (-0.909, 0.912).

366 Following initial introduction, both sites experienced multiple years of low abundance,  
367 but in 2013 the adult population at Alpine began increasing, reaching values upwards

368 of 400 adults by late-summer 2016 (Figure 4A). In contrast, at Subalpine, the adult  
369 population probably has not exceeded 50 individuals over much of the study duration,  
370 and introduction events account for the largest recruitment pulses. At both sites, infected  
371 adults tended to outnumber uninfected adults throughout the study period. The total  
372 number of adults to have ever existed ( $N_s$ ) was estimated to be 768 (686, 848) at Alpine,  
373 and 172 (147, 212) at Subalpine.

374 Infected adults experienced decreased overwinter survival, especially in the Subalpine  
375 population, unlike uninfected adults which maintained overwinter survival that was  
376 comparable to within-summer survival (Figure 4B). Bd load reduced infected adult  
377 survival at Alpine (Figure 5), with  $\beta^{(\phi^+,z)}$  estimated to be -0.132 (-0.211, -0.045) at Alpine,  
378 and -0.078 (-0.199, 0.05) at Subalpine. Winter severity appeared to increase survival of Bd  
379 infected adults at Alpine ( $\beta^{(\phi^+,s)}$ : 0.303 (0.173, 0.436), but may have been associated with  
380 lower survival at Subalpine (-0.239 (-0.465, 0)). At both sites, winter severity coefficients  
381 overlapped zero for uninfected adults ( $\beta^{(\phi^-,s)}$ : -0.044 (-0.735, 0.661) at Alpine, and 0.349  
382 (-0.139, 0.842) at Subalpine). Overall, uninfected adults had higher survival at Alpine  
383 ( $\alpha^{(\phi^-)}$ : 4.146 (3.42, 4.883)) than Subalpine ( $\alpha^{(\phi^-)}$ : 2.183 (1.782, 2.594)) (Figure 4B).

384 Introduced adults survived longer on average at Alpine compared to Subalpine (Figure  
385 6). At the end of the summer following the initial introduction of adults at Alpine,  
386 the proportion of adults surviving was 0.825 (0.675, 0.95). At Subalpine, only about  
387 half (0.583 (0.385, 0.778)) of adults survived to the end of the first summer following  
388 initial introduction. In the year after the initial introduction, the estimated proportion  
389 of introduced adults surviving at Alpine was 0.675 (0.45, 0.85), and at Subalpine just  
390 0.306 (0.139, 0.528). Similar differences in survival were evident following subsequent  
391 introductions, with low within-summer and among-year survival at Subalpine, and a  
392 higher survival rate at Alpine (Figure 6).

393 Little to no recruitment was observed during the 3-4 years following the initial

394 introductions, consistent with the multi-year larval and juvenile stages in this species  
395 (“recruitment” is the addition of new adults to the population). However, Alpine  
396 experienced large recruitment pulses in 2013, 2014, and 2016 (Figure 7). The Subalpine  
397 population had smaller pulses of recruitment during the period 4-6 years after the  
398 introduction, but little recruitment in subsequent years (Figure 7). Recruitment pulses  
399 were asynchronous between the two populations, particularly in 2016 when a very large  
400 pulse of recruits was observed at Alpine but not Subalpine.

401 Recruitment dynamics varied as a function of winter severity and Bd load. In both  
402 populations, winter severity reduced recruitment (at Alpine  $\beta^{(\lambda,s)}$ : -1.41 (-1.55, -1.264), at  
403 Subalpine  $\beta^{(\lambda,s)}$ : -1.295 (-1.612, -1.001)). Recruitment overwinter (before the first primary  
404 period of the year) was less likely than recruitment among within-year primary periods at  
405 Alpine ( $\beta^{(\lambda,w)}$ : -2.763 (-3.946, -1.551)), but more likely at Subalpine ( $\beta^{(\lambda,w)}$ : 1.677 (1.117,  
406 2.256)). Conditional on entering the population, adults at Alpine were more likely to  
407 recruit into the infected class when mean Bd loads were high ( $\beta^{(\gamma,\mu)}$ : 1.195 (0.356, 2.104)),  
408 but mean Bd load was not associated with the probability of recruiting as infected at  
409 Subalpine ( $\beta^{(\gamma,\mu)}$ : -0.575 (-2.199, 1.192)), perhaps due to low recruitment and therefore low  
410 power to detect such an effect.

411 At both sites, transitioning from the uninfected to the infected adult class (gaining  
412 infection) was more likely than transitioning from the infected to uninfected class (losing  
413 infection) over most of the study period. Among-year variation in transition probabilities  
414 was similar at both sites, with 2013 having higher than average loss-of-infection  
415 probabilities (Figure 8A). This was most likely due to exceptionally low mean Bd loads in  
416 2013: when Bd loads were low, adults were more likely to lose infection at both study sites,  
417 and less likely to gain infection in the Subalpine population (Figure 8B).

## 418 Discussion

419 The modeling approach developed here provides a quantitative means to assess how  
420 climate and disease affect demographic rates and population dynamics in hard-to-sample  
421 host populations. This builds on previous research that incorporated individual-level  
422 covariates in mark-recapture models (Pledger et al. 2003, Royle 2008, Gimenez and  
423 Choquet 2010, Ford et al. 2012), and that evaluated effects of Bd load at the individual  
424 level in wild populations (Spitzen-van der Sluijs et al. 2017). Our approach is unique in  
425 part because we treat unobserved infection status and intensity as parameters, rather  
426 than using imputation to backfill missing intensity values. Accounting for uncertainty  
427 in individual-level infection intensity in a Bayesian framework simplifies uncertainty  
428 propagation to key parameters including detection and survival probabilities. This may  
429 provide a better understanding of how individual traits relate to demographic processes  
430 and population dynamics, especially when effects of disease on detectability lead to biased  
431 capture histories.

432 Overall, results indicated that the introduction of frogs to Alpine was successful in  
433 establishing a large self-sustaining population, but unsuccessful at Subalpine. The success  
434 of the introduction effort at Alpine seems to be driven by relatively low Bd loads, high  
435 adult survival, and large recruitment pulses into the adult population following mild  
436 winters. In contrast, the failure of introductions into Subalpine was associated with higher  
437 Bd loads, lower adult survival, and smaller, infrequent recruitment pulses. The estimated  
438 effect of Bd load on the survival of infected adults was similar in both populations, but  
439 loads on average were higher at Subalpine. Given the negative effect of Bd load on frog  
440 survival, the cause of higher loads on frogs at Subalpine is worthy of additional study.  
441 In addition, the fact that the effect of Bd load on survival of infected adults was similar  
442 in both populations, but loads on average were higher at Subalpine also suggests that  
443 the observed introduction outcomes cannot be explained by differences between the two

444 populations in frog tolerance of Bd infection within summer seasons (Råberg et al. 2009,  
445 Wilber et al. 2017).

446 The two study lakes were relatively distant from each other and located in catchments  
447 with different environmental characteristics, but despite this Bd loads were temporally  
448 correlated across the two sites. The synchrony in expected load is worth further  
449 investigation, as it may indicate environmental forcing of disease dynamics, e.g., variation  
450 due to temperature (Phillott et al. 2013, Cohen et al. 2017), but see (Knapp et al.  
451 2011), or some form of connectivity among sites, although the latter possibility seems  
452 unlikely. Future studies might also seek to better disentangle landscape-wide factors  
453 driving synchrony and local factors that drive differences in mean load, particularly in the  
454 context of known mechanisms of disease-induced extinction such as non-density dependent  
455 transmission (Rachowicz and Briggs 2007, Orlofske et al. 2018), nonamphibian reservoir  
456 hosts (McMahon et al. 2013), and small equilibrium densities in the presence of disease  
457 (De Castro and Bolker 2005).

458 Although between-population differences in Bd load provide a straightforward explanation  
459 for the lower survival of infected adults at Subalpine compared to Alpine (Briggs et  
460 al. 2010), it is less obvious why uninfected adults also had lower survival at Subalpine.  
461 Low uninfected survival may result from differences in habitat characteristics and/or  
462 the abundance of terrestrial or aquatic predators that prey on adult frogs. For example,  
463 in 2013 ten translocated frogs at each site were tracked for several weeks using radio  
464 telemetry. At Subalpine, two of these frogs were preyed on by garter snakes (*Thamnophis*  
465 *elegans*, (Jennings et al. 1992)) and no evidence of predation was observed at Alpine.

466 We found that infected adults were easier to detect than uninfected adults, and at Alpine,  
467 infection load increased detection probability among infected individuals. This could relate  
468 to infection-related behavior that makes frogs easier to find and/or capture (Johnson  
469 2002). For example, some amphibians increase feeding activity when infected with Bd

470 (Hess et al. 2015). If this is the case for *R. sierrae*, we might expect frogs to spend more  
471 time around the lake edge, where they would be more conspicuous to observers. Some  
472 previous studies have assumed equal detectability among infected and uninfected frogs  
473 (Briggs et al. 2010, Stegen et al. 2017), while others have not (Retallick et al. 2004,  
474 Murray et al. 2009, Phillott et al. 2013). Our results indicate that even accounting for  
475 unequal detectability between uninfected and infected animals may not be sufficient,  
476 because Bd load may further affect detectability among infected individuals. Future  
477 studies should evaluate conditions under which disease impacts on detectability could bias  
478 estimates of demographic rates in wild populations.

479 The recruitment model developed here may be somewhat simplistic in its focus on adults.  
480 In reality, recruitment into the adult population is a function of dynamics in the subadult  
481 and larval populations. In particular, in mountain yellow-legged frogs and many other frog  
482 species Bd infection imposes heavy mortality during metamorphosis, but disease effects on  
483 larval stages are relatively weak (Rachowicz and Vredenburg 2004, Rachowicz et al. 2006).  
484 Therefore, to fully understand how factors such as winter severity and disease influence  
485 population dynamics by way of affecting larvae, subadults, and adults, future efforts  
486 might focus on incorporating elements of integral projection models (Wilber et al. 2016)  
487 and integrated population models (Schaub and Abadi 2011) with hidden Markov models  
488 similar to those we developed in this study. A joint model for larval, subadult, and adult  
489 population dynamics would be better able to account for time lags resulting from the 1-4  
490 year larval development period of this species (Vredenburg et al. 2005). For example, one  
491 severe winter could have long-lasting effects if it slows the development of larvae so that  
492 they develop in three rather than two years, but this effect might not be detectable as  
493 a signal for adult recruitment until four years after the severe winter, depending on the  
494 growth rate of subadult frogs.

495 Our results provide important insights into causes of population establishment or likely

496 failure for the endangered *R. sierrae*. The two study populations showed very different  
497 patterns of adult survival and recruitment, and in particular, within a population  
498 the estimated survival of introduced cohorts was remarkably consistent across all  
499 introductions. Although the generality of results obtained from these two populations need  
500 to be assessed using data from mark-recapture efforts at other reintroduced populations,  
501 the results suggest that the estimated survival of reintroduced frogs could provide an  
502 early indication of the site-specific probability of introduction success. In addition, in the  
503 future, when survival estimates of reintroduced frogs are available from a larger number of  
504 populations, these estimates could eventually allow the identification of site characteristics  
505 associated with likely introduction success or failure. This predictive ability would greatly  
506 increase the effectiveness of mountain yellow-legged frog recovery efforts.

## 507 **Acknowledgments**

508 We thank the following people and institutions for important contributions to this  
509 study: numerous people who assisted with the field work (especially N. Kauffman, A.  
510 Killion, A. Lindauer, J. Maurer, and S. Ostoja); R. Chen, K. Rose, and M. Toothman  
511 for qPCR assistance; C. Briggs and M. Wilber for reviewing an earlier draft of the  
512 manuscript; and Yosemite National Park (R. Grasso, H. McKenny, and S. Thompson), U.S.  
513 Geological Survey - Western Ecological Research Center (M. Brooks and S. Ostoja), and  
514 the University of California Natural Reserve System - Sierra Nevada Aquatic Research  
515 Laboratory (DOI: 10.21973/N3966F) for logistical support and valuable discussions.  
516 Research permits were provided by Yosemite National Park, U.S. Fish and Wildlife  
517 Service, and the Institutional Animal Care and Use Committee at the University of  
518 California, Santa Barbara. This project was funded by grants from the National Park  
519 Service (to R.A.K.), Yosemite Conservancy (to Yosemite National Park and R.A.K.), U.S.  
520 Geological Survey (Ecosystems Mission Area - Natural Resource Preservation Program,



521 to M. Brooks and R. Knapp for the project titled “Factors influencing reintroduction  
522 success of the endangered mountain yellow-legged frog”, and National Science Foundation  
523 (DEB-1557190, to C. Briggs and R. Knapp). We also thank H. Ito for translating  
524 mark-recapture model specifications from JAGS to Stan, as this greatly simplified our  
525 implementation.

## 526 **Author contributions**

527 R.A.K. designed and performed the research; R.A.K. assembled and maintained the study  
528 data set; M.B.J. and R.A.K. developed the models, M.B.J. analyzed the data; M.B.J. and  
529 R.A.K. wrote the paper.

## 530 **Literature cited**

- 531 Allaire, J., Y. Xie, J. McPherson, J. Luraschi, K. Ushey, A. Atkins, H. Wickham, J.  
532 Cheng, and W. Chang. 2018. rmarkdown: Dynamic documents for R.
- 533 Armstrong, D. P., and P. J. Seddon. 2008. Directions in reintroduction biology. Trends in  
534 Ecology and Evolution 23:20–25.
- 535 Arnold, J. B. 2018. ggthemes: Extra themes, scales and geoms for 'ggplot2'.
- 536 Boettiger, C. 2015. An introduction to docker for reproducible research. ACM SIGOPS  
537 Operating Systems Review 49:71–79.
- 538 Boyle, D., D. Boyle, V. Olsen, J. Morgan, and A. Hyatt. 2004. Rapid quantitative  
539 detection of chytridiomycosis (*Batrachochytrium dendrobatidis*) in amphibian samples  
540 using real-time Taqman PCR assay. Diseases of Aquatic Organisms 60:141–148.
- 541 Briggs, C. J., R. A. Knapp, and V. T. Vredenburg. 2010. Enzootic and epizootic dynamics  
542 of the chytrid fungal pathogen of amphibians. Proceedings of the National Academy of

543 Sciences USA 107:9695–9700.

544 Carpenter, B., A. Gelman, M. Hoffman, D. Lee, B. Goodrich, M. Betancourt, M. A.

545 Brubaker, J. Guo, P. Li, and A. Riddell. 2016. Stan: A probabilistic programming

546 language. *Journal of Statistical Software* 20:1–37.

547 Cohen, J. M., M. D. Venesky, E. L. Sauer, D. J. Civitello, T. A. McMahon, E. A. Roznik,

548 and J. R. Rohr. 2017. The thermal mismatch hypothesis explains host susceptibility to an

549 emerging infectious disease. *Ecology Letters* 20:184–193.

550 Conn, P. B., and E. G. Cooch. 2009. Multistate capture–recapture analysis under

551 imperfect state observation: An application to disease models. *Journal of Applied Ecology*

552 46:486–492.

553 De Castro, F., and B. Bolker. 2005. Mechanisms of disease-induced extinction. *Ecology*

554 *Letters* 8:117–126.

555 Dennis, E. B., B. J. Morgan, and M. S. Ridout. 2015. Computational aspects of

556 N-mixture models. *Biometrics* 71:237–246.

557 Fellers, G. M., D. E. Green, and J. E. Longcore. 2001. Oral chytridiomycosis in the

558 mountain yellow-legged frog (*Rana muscosa*). *Copeia* 2001:945–953.

559 Fisher, M. C., T. W. Garner, and S. F. Walker. 2009. Global emergence of *Batrachochytrium*

560 *dendrobatidis* and amphibian chytridiomycosis in space, time, and host. *Annual Review of*

561 *Microbiology* 63:291–310.

562 Ford, J. H., M. V. Bravington, and J. Robbins. 2012. Incorporating individual variability

563 into mark–recapture models. *Methods in Ecology and Evolution* 3:1047–1054.

564 Gimenez, O., and R. Choquet. 2010. Individual heterogeneity in studies on marked

565 animals using numerical integration: Capture–recapture mixed models. *Ecology*

566 91:951–957.

567 Grant, E. H. C., D. A. Miller, B. R. Schmidt, M. J. Adams, S. M. Amburgey, T.

568 Chambert, S. S. Cruickshank, R. N. Fisher, D. M. Green, B. R. Hossack, and others. 2016.

569 Quantitative evidence for the effects of multiple drivers on continental-scale amphibian

570 declines. *Scientific Reports* 6:25625.

571 Grolemund, G., and H. Wickham. 2011. Dates and times made easy with lubridate.

572 *Journal of Statistical Software* 40:1–25.

573 Hess, A., C. McAllister, J. DeMarchi, M. Zidek, J. Murone, and M. D. Venesky. 2015.

574 Salamanders increase their feeding activity when infected with the pathogenic chytrid

575 fungus *Batrachochytrium dendrobatidis*. *Diseases of Aquatic Organisms* 116:205–212.

576 Hudson, M. A., R. P. Young, J. Lopez, L. Martin, C. Fenton, R. McCrea, R. A. Griffiths,

577 S.-L. Adams, G. Gray, G. Garcia, and others. 2016. In-situ itraconazole treatment

578 improves survival rate during an amphibian chytridiomycosis epidemic. *Biological*

579 *Conservation* 195:37–45.

580 Hyatt, A. D., D. G. Boyle, V. Olsen, D. B. Boyle, L. Berger, D. Obendorf, A. Dalton,

581 K. Kriger, M. Hero, H. Hines, R. Phillott, R. Campbell, G. Marantelli, F. Gleason,

582 and A. Colling. 2007. Diagnostic assays and sampling protocols for the detection of

583 *Batrachochytrium dendrobatidis*. *Diseases of Aquatic Organisms* 73:175–192.

584 IUCN. 2017. The IUCN red list of threatened species. version 2017-3. [http://www.](http://www.iucnredlist.org)

585 [iucnredlist.org](http://www.iucnredlist.org).

586 Jennings, W. B., D. F. Bradford, and D. F. Johnson. 1992. Dependence of the garter

587 snake *Thamnophis elegans* on amphibians in the Sierra Nevada of California. *Journal of*

588 *Herpetology* 26:503–505.

589 Johnson, R. 2002. The concept of sickness behavior: A brief chronological account of four

- 590 key discoveries. *Veterinary Immunology and Immunopathology* 87:443–450.
- 591 Jolly, G. M. 1965. Explicit estimates from capture-recapture data with both death and  
592 immigration-stochastic model. *Biometrika* 52:225–247.
- 593 Joseph, M. B., and R. A. Knapp. 2018. SNARL1/sierra-reintroduction-cmr: Initial release.
- 594 Knapp, R. A. 2005. Effects of nonnative fish and habitat characteristics on lentic  
595 herpetofauna in Yosemite National Park, USA. *Biological Conservation* 121:265–279.
- 596 Knapp, R. A., and K. R. Matthews. 2000. Non-native fish introductions and the decline  
597 of the mountain yellow-legged frog from within protected areas. *Conservation Biology*  
598 14:428–438.
- 599 Knapp, R. A., C. J. Briggs, T. C. Smith, and J. R. Maurer. 2011. Nowhere to hide:  
600 Impact of a temperature-sensitive amphibian pathogen along an elevation gradient in the  
601 temperate zone. *Ecosphere* 2:1–26.
- 602 Knapp, R. A., G. M. Fellers, P. M. Kleeman, D. A. Miller, V. T. Vredenburg, E. B.  
603 Rosenblum, and C. J. Briggs. 2016. Large-scale recovery of an endangered amphibian  
604 despite ongoing exposure to multiple stressors. *Proceedings of the National Academy of*  
605 *Sciences USA* 113:11889–11894.
- 606 Kriger, K. M., J.-M. Hero, and K. J. Ashton. 2006. Cost efficiency in the detection of  
607 chytridiomycosis using PCR assay. *Diseases of Aquatic Organisms* 71:149–154.
- 608 Kucukelbir, A., R. Ranganath, A. Gelman, and D. Blei. 2015. Automatic variational  
609 inference in Stan. Pages 568–576 *in* C. Cortes, N. D. Lawrence, D. D. Lee, M. Sugiyama,  
610 and R. Garnett, editors. *Advances in neural information processing systems*. Curran  
611 Associates, Red Hook, New York, USA.
- 612 Lebreton, J., and R. P. Cefe. 2002. Multistate recapture models: Modelling incomplete

- 613 individual histories. *Journal of Applied Statistics* 29:353–369.
- 614 Lindenmayer, D., and B. Scheele. 2017. Do not publish. *Science* 356:800–801.
- 615 Longo, A. V., D. Rodriguez, D. da Silva Leite, L. F. Toledo, C. M. Almeralla, P. A.  
616 Burrowes, and K. R. Zamudio. 2013. ITS1 copy number varies among *Batrachochytrium*  
617 *dendrobatidis* strains: Implications for qPCR estimates of infection intensity from  
618 field-collected amphibian skin swabs. *PLoS One* 8:e59499.
- 619 McCallum, H., and A. Dobson. 1995. Detecting disease and parasite threats to endangered  
620 species and ecosystems. *Trends in Ecology and Evolution* 10:190–194.
- 621 McMahon, T. A., L. A. Brannelly, M. W. Chatfield, P. T. Johnson, M. B. Joseph, V. J.  
622 McKenzie, C. L. Richards-Zawacki, M. D. Venesky, and J. R. Rohr. 2013. Chytrid fungus  
623 *Batrachochytrium dendrobatidis* has nonamphibian hosts and releases chemicals that cause  
624 pathology in the absence of infection. *Proceedings of the National Academy of Sciences*  
625 USA 110:210–215.
- 626 Miller, D. A., B. L. Talley, K. R. Lips, and E. H. Campbell Grant. 2012. Estimating  
627 patterns and drivers of infection prevalence and intensity when detection is imperfect and  
628 sampling error occurs. *Methods in Ecology and Evolution* 3:850–859.
- 629 Murray, K. A., L. F. Skerratt, R. Speare, and H. McCallum. 2009. Impact and dynamics  
630 of disease in species threatened by the amphibian chytrid fungus, *Batrachochytrium*  
631 *dendrobatidis*. *Conservation Biology* 23:1242–1252.
- 632 Orlofske, S. A., S. M. Flaxman, M. B. Joseph, A. Fenton, B. A. Melbourne, and P.  
633 T. Johnson. 2018. Experimental investigation of alternative transmission functions:  
634 Quantitative evidence for the importance of nonlinear transmission dynamics in

635 host–parasite systems. *Journal of Animal Ecology* 87:703–715.

636 Pedersen, T. L. 2017. *patchwork*: The composer of ggplots.

637 Phillott, A. D., L. F. Grogan, S. D. Cashins, K. R. McDonald, L. Berger, and L. F.

638 Skerratt. 2013. Chytridiomycosis and seasonal mortality of tropical stream-associated

639 frogs 15 years after introduction of *Batrachochytrium dendrobatidis*. *Conservation Biology*

640 27:1058–1068.

641 Pilliod, D. S., E. Muths, R. D. Scherer, P. E. Bartelt, P. S. Corn, B. R. Hossack, B. A.

642 Lambert, R. Mccaffery, and C. Gaughan. 2010. Effects of amphibian chytrid fungus on

643 individual survival probability in wild boreal toads. *Conservation Biology* 24:1259–1267.

644 Pledger, S., K. H. Pollock, and J. L. Norris. 2003. Open capture-recapture models with

645 heterogeneity: I. Cormack-Jolly-Seber model. *Biometrics* 59:786–794.

646 Pradel, R. 1996. Utilization of capture-mark-recapture for the study of recruitment and

647 population growth rate. *Biometrics* 52:703–709.

648 R Core Team. 2017. R: A language and environment for statistical computing

649 <https://www.R-project.org/>. R Foundation for Statistical Computing, Vienna, Austria.

650 Rachowicz, L. J., and C. J. Briggs. 2007. Quantifying the disease transmission function:

651 Effects of density on *Batrachochytrium dendrobatidis* transmission in the mountain

652 yellow-legged frog *Rana muscosa*. *Journal of Animal Ecology* 76:711–721.

653 Rachowicz, L. J., and V. T. Vredenburg. 2004. Transmission of *Batrachochytrium*

654 *dendrobatidis* within and between amphibian life stages. *Diseases of Aquatic Organisms*

655 61:75–83.

656 Rachowicz, L. J., R. A. Knapp, J. A. Morgan, M. J. Stice, V. T. Vredenburg, J. M. Parker,

657 and C. J. Briggs. 2006. Emerging infectious disease as a proximate cause of amphibian

658 mass mortality. *Ecology* 87:1671–1683.

659 Råberg, L., A. L. Graham, and A. F. Read. 2009. Decomposing health: Tolerance and  
660 resistance to parasites in animals. *Philosophical Transactions of the Royal Society B:  
661 Biological Sciences* 364:37–49.

662 Retallick, R. W., H. McCallum, and R. Speare. 2004. Endemic infection of the amphibian  
663 chytrid fungus in a frog community post-decline. *PLoS Biology* 2:e351.

664 Royle, J. A. 2008. Modeling individual effects in the Cormack–Jolly–Seber model: A  
665 state–space formulation. *Biometrics* 64:364–370.

666 Royle, J. A. 2009. Analysis of capture–recapture models with individual covariates using  
667 data augmentation. *Biometrics* 65:267–274.

668 Royle, J. A., and R. M. Dorazio. 2012. Parameter-expanded data augmentation for  
669 Bayesian analysis of capture–recapture models. *Journal of Ornithology* 152:521–537.

670 Sapsford, S. J., M. J. Voordouw, R. A. Alford, and L. Schwarzkopf. 2015. Infection  
671 dynamics in frog populations with different histories of decline caused by a deadly disease.  
672 *Oecologia* 179:1099–1110.

673 Schaub, M., and F. Abadi. 2011. Integrated population models: A novel analysis  
674 framework for deeper insights into population dynamics. *Journal of Ornithology*  
675 152:227–237.

676 Sinsch, U. 1984. Thermal influences on the habitat preference and the diurnal activity in  
677 three european *Rana* species. *Oecologia* 64:125–131.

678 Skerratt, L. F., L. Berger, R. Speare, S. Cashins, K. R. McDonald, A. D. Phillott, H.  
679 B. Hines, and N. Kenyon. 2007. Spread of chytridiomycosis has caused the rapid global

680 decline and extinction of frogs. *EcoHealth* 4:125–134.

681 Slowikowski, K. 2017. `ggrepel`: Repulsive text and label geoms for 'ggplot2'.

682 Spitzen-van der Sluijs, A., S. Canessa, A. Martel, and F. Pasmans. 2017. Fragile  
683 coexistence of a global chytrid pathogen with amphibian populations is mediated by  
684 environment and demography. *Proceedings of the Royal Society of London B: Biological  
685 Sciences* 284:20171444.

686 Stallman, R. M., R. McGrath, and P. D. Smith. 2004. GNU Make: A program for  
687 directing recompilation, for version 3.81. Free Software Foundation.

688 Stan Development Team. 2016. RStan: The R interface to Stan.

689 Stegen, G., F. Pasmans, B. R. Schmidt, L. O. Rouffaer, S. Van Praet, M. Schaub, S.  
690 Canessa, A. Laudelout, T. Kinet, C. Adriaensen, and others. 2017. Drivers of salamander  
691 extirpation mediated by *Batrachochytrium salamandrivorans*. *Nature* 544:353.

692 Vredenburg, V. T., R. Bingham, R. Knapp, J. A. Morgan, C. Moritz, and D. Wake. 2007.  
693 Concordant molecular and phenotypic data delineate new taxonomy and conservation  
694 priorities for the endangered mountain yellow-legged frog. *Journal of Zoology* 271:361–374.

695 Vredenburg, V. T., G. M. Fellers, and C. Davidson. 2005. The mountain yellow-legged  
696 frog (*Rana muscosa*). Pages 563–566 in M. J. Lannoo, editor. *Amphibian declines: The  
697 conservation status of United States species*. University of California Press, Berkeley.

698 Vredenburg, V. T., R. A. Knapp, T. S. Tunstall, and C. J. Briggs. 2010. Dynamics of an  
699 emerging disease drive large-scale amphibian population extinctions. *Proceedings of the  
700 National Academy of Sciences USA* 107:9689–9694.

701 Wake, D. B., and V. T. Vredenburg. 2008. Are we in the midst of the sixth mass  
702 extinction? A view from the world of amphibians. *Proceedings of the National Academy*



703 of Sciences USA 105:11466–11473.

704 Wickham, H. 2007. Reshaping data with the reshape package. *Journal of Statistical*  
705 *Software* 21:1–20.

706 Wickham, H. 2017a. `assertthat`: Easy pre and post assertions.

707 Wickham, H. 2017b. `tidyverse`: Easily install and load the 'tidyverse'.

708 Wilber, M. Q., R. A. Knapp, M. Toothman, and C. J. Briggs. 2017. Resistance,  
709 tolerance and environmental transmission dynamics determine host extinction risk in a  
710 load-dependent amphibian disease. *Ecology Letters* 20:1169–1181.

711 Wilber, M. Q., K. E. Langwig, A. M. Kilpatrick, H. I. McCallum, and C. J. Briggs. 2016.  
712 Integral projection models for host–parasite systems with an application to amphibian  
713 chytrid fungus. *Methods in Ecology and Evolution* 7:1182–1194.

714 Wilke, C. O. 2018. `ggridges`: Ridgeline plots in 'ggplot2'.

715 Wood, S. 2017. *Generalized additive models: An introduction with R*. Chapman &  
716 Hall/CRC.

717 Wood, S. N. 2004. Stable and efficient multiple smoothing parameter estimation for  
718 generalized additive models. *Journal of the American Statistical Association* 99:673–686.

719 Zucchini, W., I. L. MacDonald, and R. Langrock. 2016. *Hidden Markov models for time*  
720 *series: An introduction using R*. Chapman & Hall/CRC.

## 721 Tables

Table 1 Schedule of frog introductions to the study lakes.

| Lake      | Year | Number of frogs |
|-----------|------|-----------------|
| Alpine    | 2006 | 40              |
| .         | 2013 | 20              |
| Subalpine | 2008 | 36              |
| .         | 2013 | 19              |
| .         | 2015 | 20              |
| .         | 2017 | 30              |

## 722 **Figure legends**

### 723 **Figure 1**

724 Summary of hidden Markov model structure. On the first primary period  $t = 1$ , we  
725 assume that all individuals  $i = 1, \dots, M$  are in the not-recruited class. The second  
726 primary period represents the first introduction. In this example, two surveys  $j = 1, 2$  are  
727 conducted on the third primary period. The fourth primary period is a dummy period,  
728 inserted to increase the regularity of time intervals between primary periods, and has no  
729 associated surveys.

### 730 **Figure 2**

731 A. Estimated detection probabilities as a function of survey air temperature for  
732 Bd-infected and uninfected adults. The ribbons represent the 90% posterior credible  
733 interval, and the line represents the posterior median. Predictions for Bd infected adults  
734 correspond to individuals with average infection loads at each site. B. Parameter estimates  
735 for the detection model. Each of the detection parameters are shown on the y-axis. Color  
736 indicates population.

### 737 **Figure 3**

738 *Batrachochytrium dendrobatidis* (Bd) infection loads over time. Observed load values from  
739 skin swabs are shown as points on a log10 scale, colored by site. The estimated average Bd  
740 infection load is shown as a line (posterior median) with a 90% credible interval ribbon.

741 **Figure 4**

742 Estimated abundance (A) and survival (B) time series for infected and uninfected adults  
743 at both populations. Time is shown on the x-axis, with facets for years. Posterior medians  
744 for each primary period are shown as points connected by line segments, and the 90%  
745 credible interval is shown as a shaded ribbon. In A, the vertical dashed lines indicate  
746 introduction events, and the number of adults added in each event is indicated with a  
747 “+” symbol. Also note the difference in the y-axis scales between the two sites.

748 **Figure 5**

749 Estimated survival probabilities for within-summer and overwinter transitions among  
750 infected adults as a function of Bd infection load. The x-axis shows Bd load over the range  
751 of observed values. The y-axis represents survival probabilities. Posterior medians are lines  
752 and 90% credible intervals are ribbons.

753 **Figure 6**

754 Estimated survival of introduced adults at both populations, colored by introduction event.  
755 Time is shown on the x-axis, with the proportion of adults surviving on the y-axis. The  
756 number of individuals introduced in each introduction event is labeled as (n=...). The  
757 ribbons represent the 90% posterior credible interval, with the midline representing the  
758 posterior median.

759 **Figure 7**

760 Estimated cumulative number of natural recruits into the adult population at both sites  
761 over time (on a log<sub>10</sub> scale). The ribbons represent the 90% posterior credible interval,

762 with the midline representing the posterior median. Dots connected by lines represent  
763 primary periods.

764 **Figure 8**

765 A. Estimated transition probabilities between the uninfected and infected adult classes at  
766 both sites in each year. Ribbons represent the 90% posterior credible interval, with the  
767 midline representing the posterior median. Dots connected by lines represent years. B.  
768 Estimated transition probabilities from the uninfected adult class to the infected adult  
769 class and vice versa as a function of expected Bd load among infected adults. The line  
770 represents the posterior median, and the ribbons indicate the 95% credible interval, with  
771 colors differentiating study sites.

772 **Figures**

Figure 1

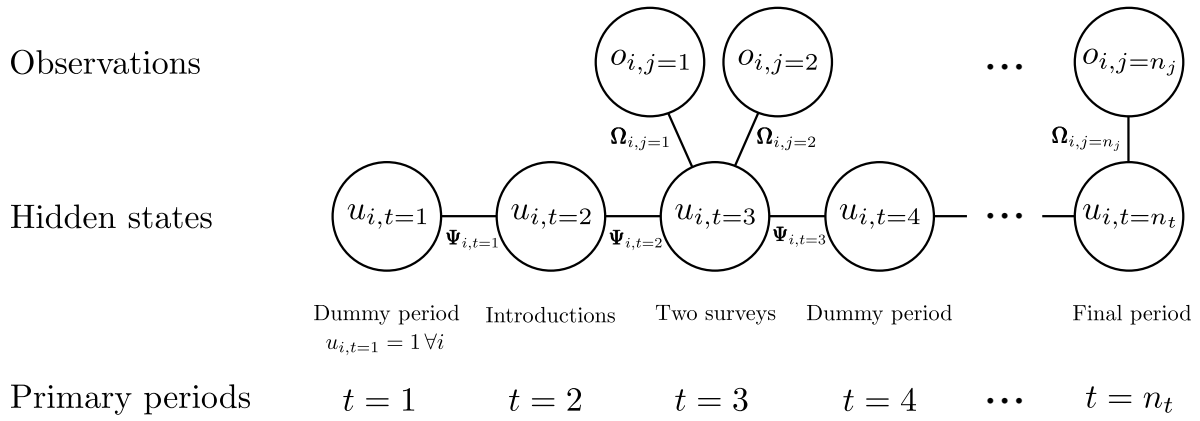

Figure 2

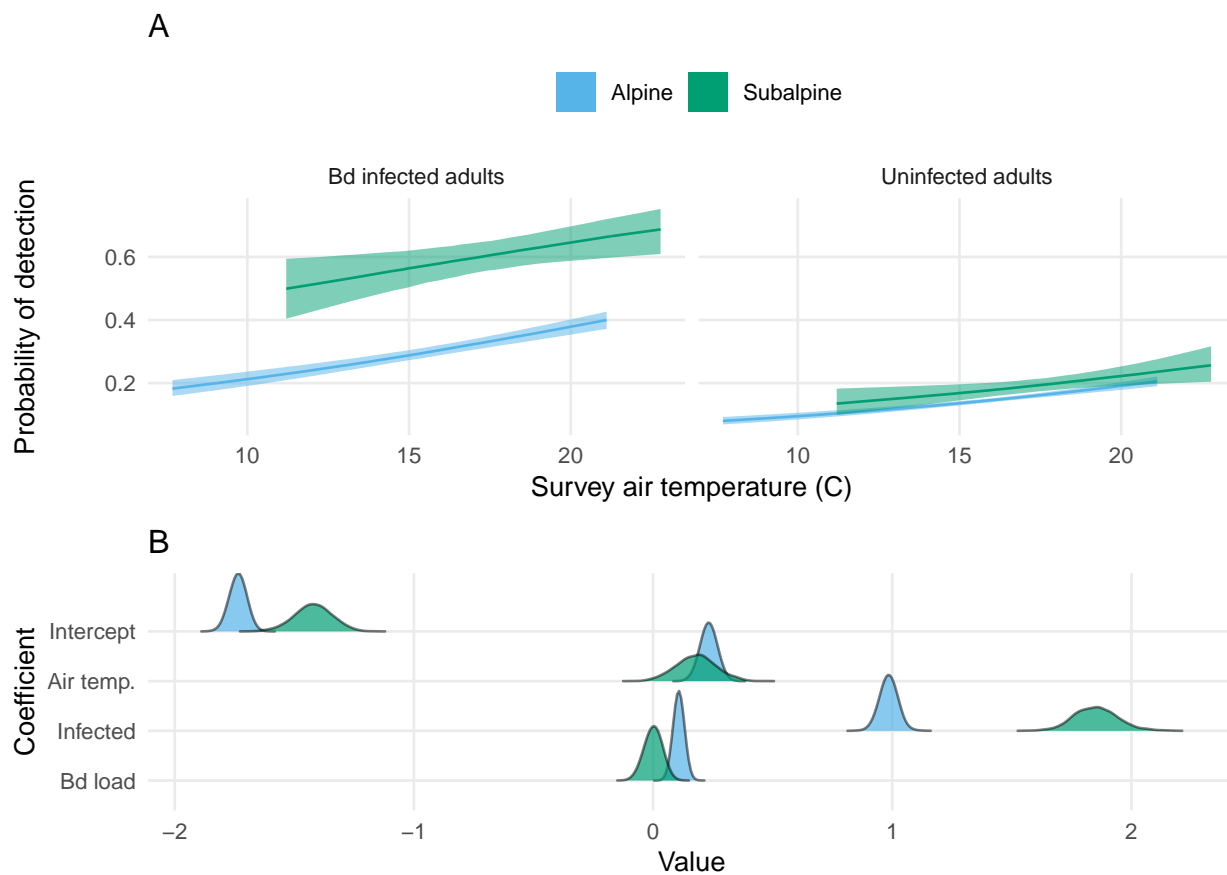

Figure 3

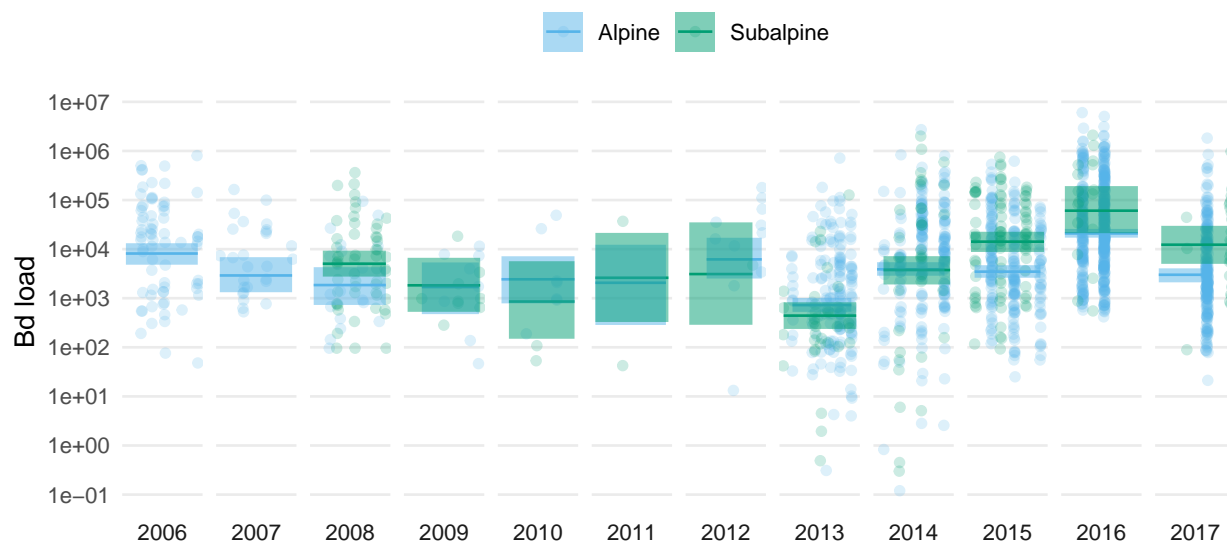



Figure 4

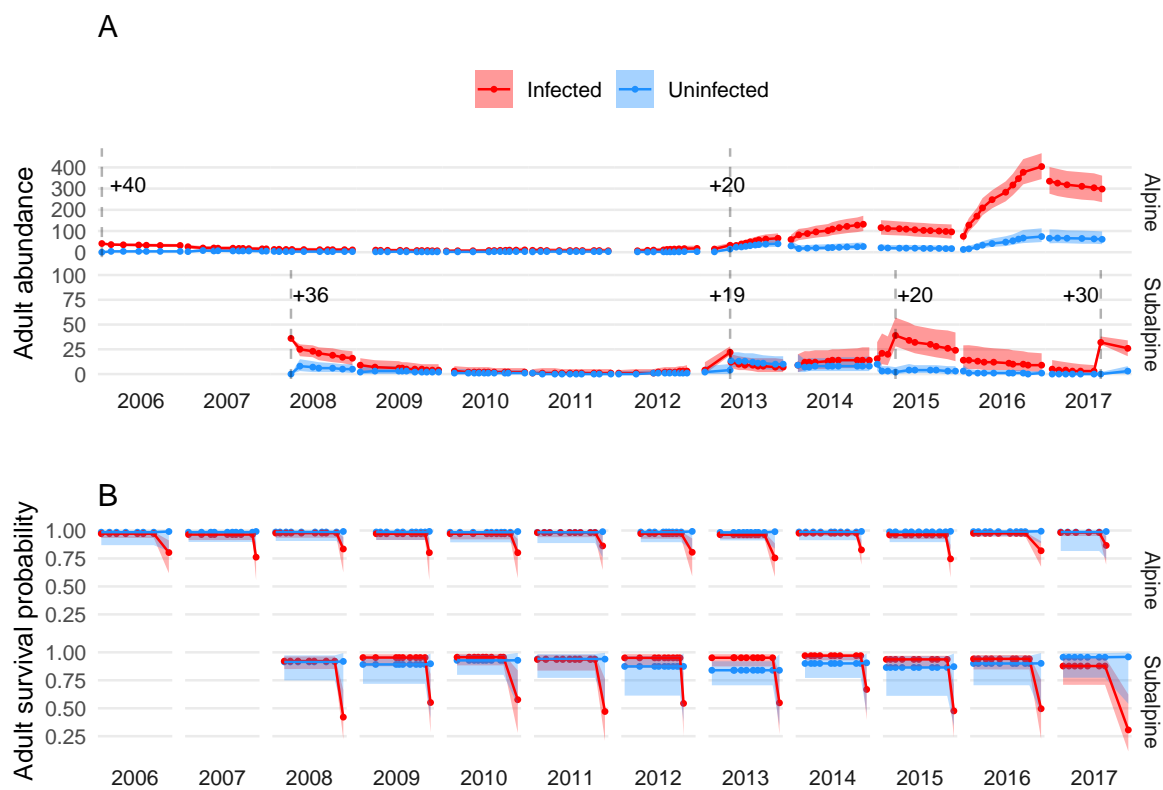

Figure 5

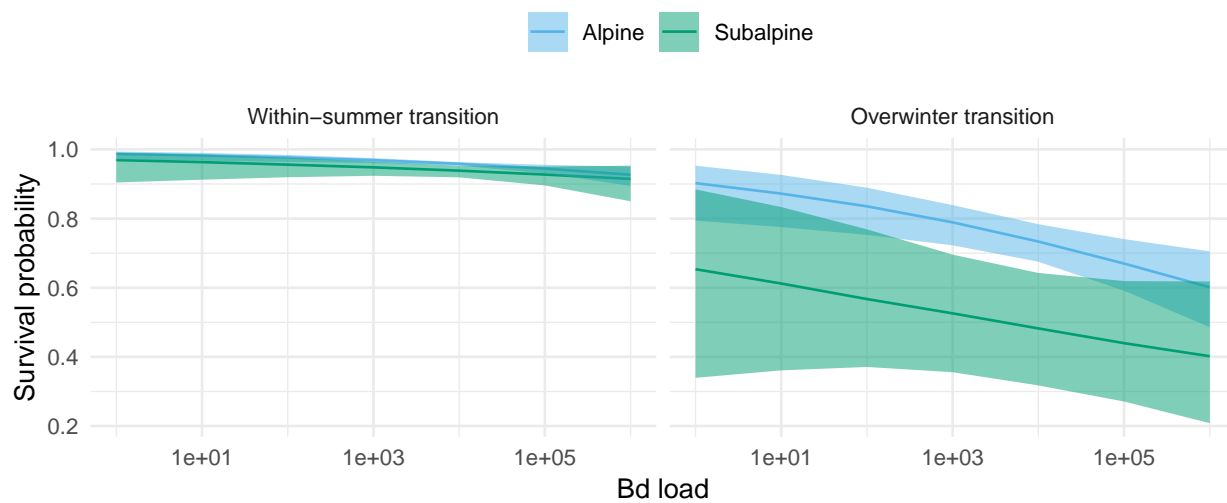

Figure 6

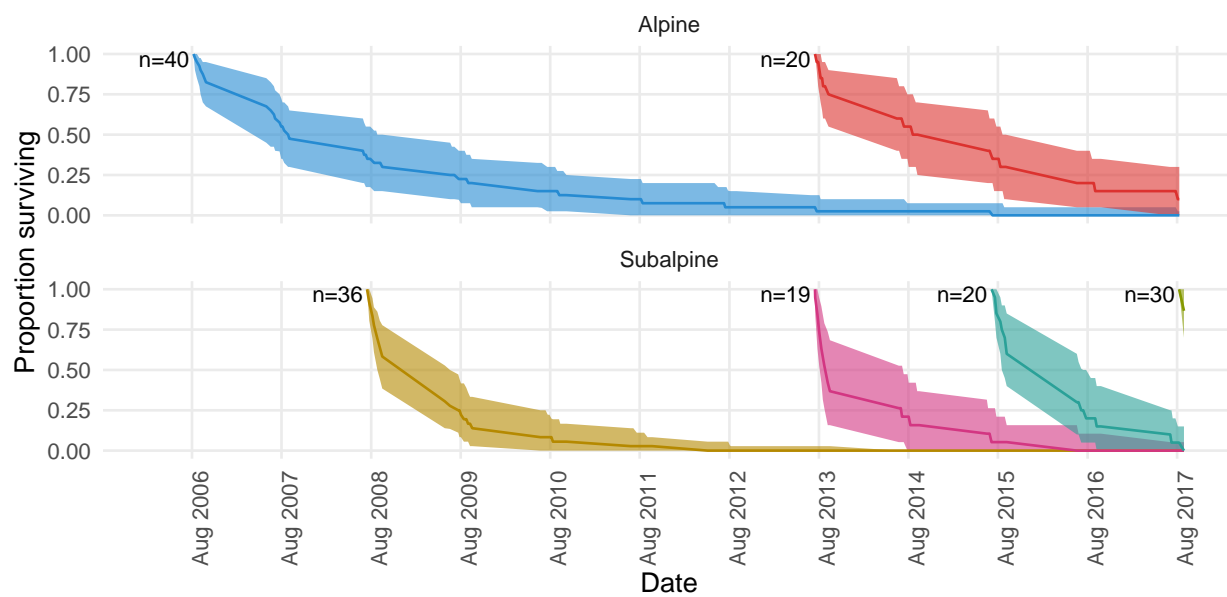

Figure 7

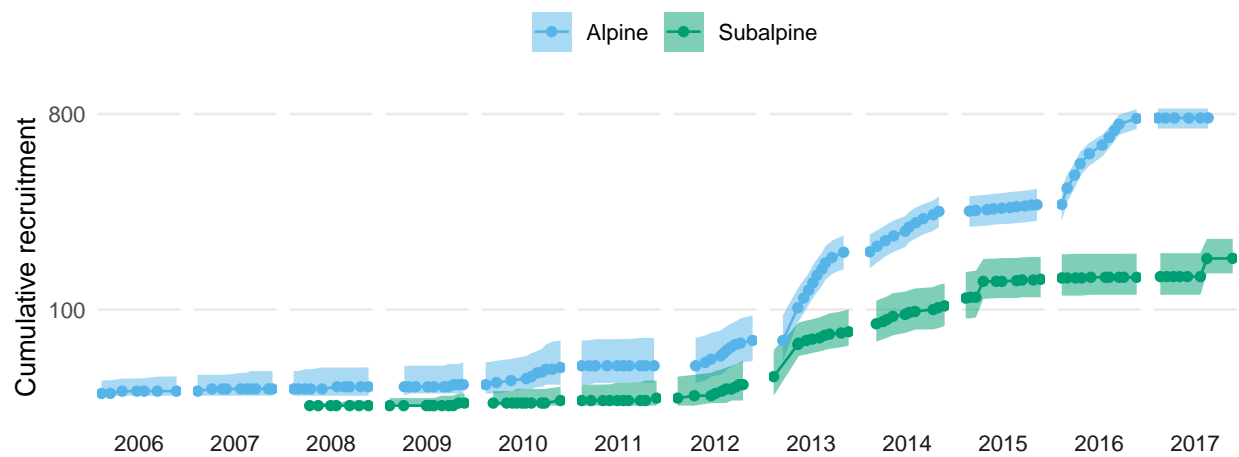

Figure 8

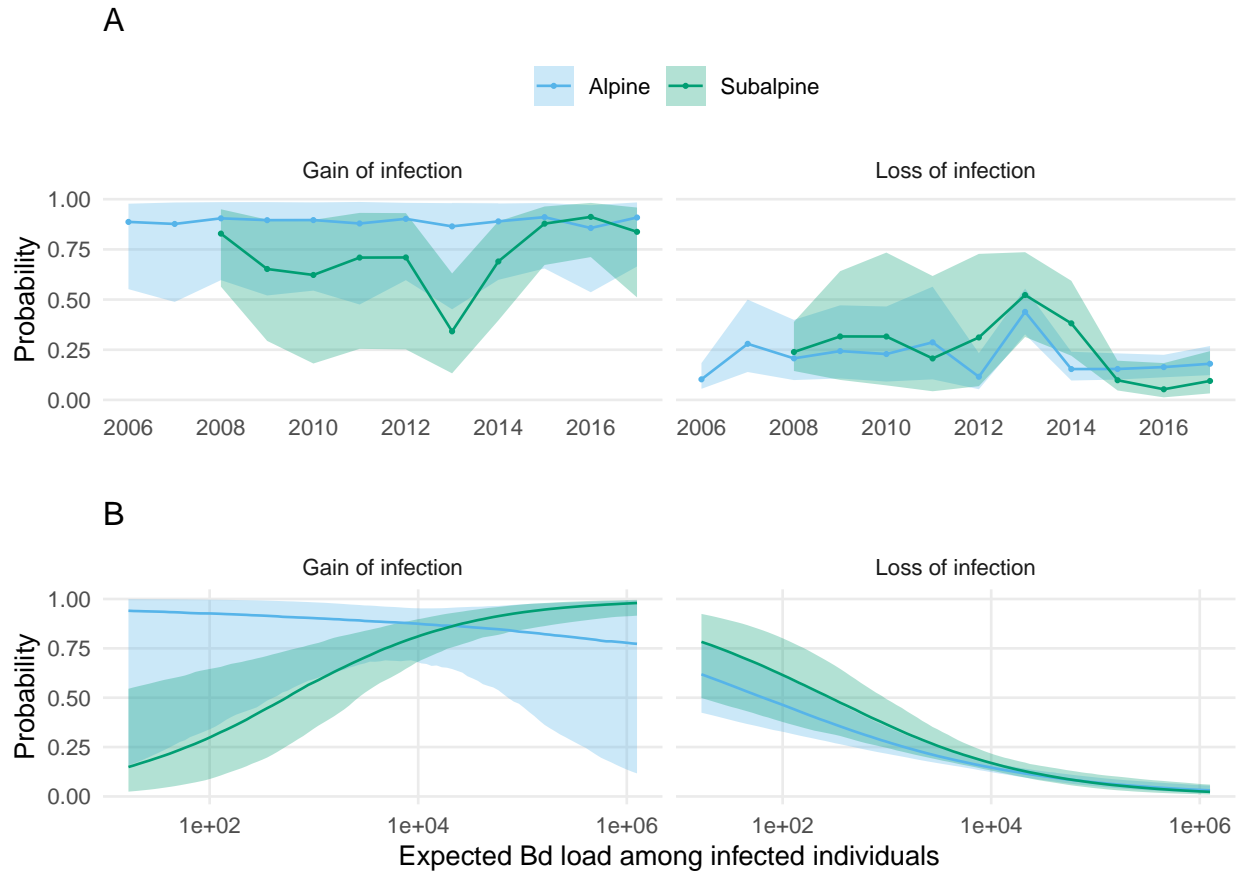

## 773 Appendices

### 774 Appendix A: Joint distribution factorization

775 For completeness, we specify the factorization of the joint distribution of data and  
776 parameters (the unnormalized posterior density) below. We represent all unknowns  
777 specific to the detection model as a vector  $\theta^{(p)} = (\alpha^{(p)}, \beta^{(p,x)}, \beta^{(p,+)}, \beta^{(p,z)})$ , parameters  
778 specific to the probability of entry model as a vector  $\theta^{(\lambda)}$ , to the probability of recruiting  
779 into the infected adult class given that an individual has entered the population as  $\theta^{(\gamma)}$ ,  
780 to uninfected survival as  $\theta^{(\phi^-)}$ , and to the infected survival model component as  $\theta^{(\phi^+)}$ .  
781 Concatenating these two vectors gives a vector that contains all unique survival model  
782 parameters:  $\theta^{(\phi)} = (\theta^{(\phi^-)}, \theta^{(\phi^+)})$ . Last, we represent parameters unique to transitions from  
783 the infected to uninfected class as  $\theta^{(\eta^-)}$ , and from the uninfected to infected class as  $\theta^{(\eta^+)}$ ,  
784 with both concatenated as  $\theta^{(\eta)} = (\theta^{(\eta^-)}, \theta^{(\eta^+)})$ . The resulting joint distribution is:

$$\begin{aligned}
 & \overbrace{\prod_{i=1}^M [u_{i,1:n_t}, o_{i,1:n_j} | \theta^{(\lambda)}, \theta^{(\gamma)}, \theta^{(\phi)}, \theta^{(\eta)}, \theta^{(p)}, z_{i,1:n_t}]}^{\text{Hidden states and observations}} \times \\
 & \overbrace{[\mathbf{Z} | \mu, \sigma][\mu | \alpha^{(\mu)}, \beta^{(\mu)}, \sigma^{(\mu)}][\alpha^{(\mu)}][\beta^{(\mu)}][\sigma^{(\mu)}][\sigma]}^{\text{Bd model}} \times \\
 & \overbrace{[\alpha^{(\lambda)}][\beta^{(\lambda,w)}][\beta^{(\lambda,s)}][\beta^{(\lambda,1)}] \prod_{y=1}^{n_y} [\epsilon_y^{(\lambda)} | \sigma^{(\lambda)}][\sigma^{(\lambda)}]}^{\text{Prior distributions}} \times \\
 & [\alpha^{(\gamma)}][\beta^{(\gamma,\mu)}] \prod_{y=1}^{n_y} [\epsilon_y^{(\gamma)} | \sigma^{(\gamma)}][\sigma^{(\gamma)}] \times \\
 & [\alpha^{(\phi^-)}][\beta^{(\phi^-,w)}][\beta^{(\phi^-,s)}] \prod_{y=1}^{n_y} [\epsilon_y^{(\phi^-)} | \sigma^{(\phi^-)}][\sigma^{(\phi^-)}] \times \\
 & [\alpha^{(\phi^+)}][\beta^{(\phi^+,w)}][\beta^{(\phi^+,s)}][\beta^{(\phi^+,z)}] \prod_{y=1}^{n_y} [\epsilon_y^{(\phi^+)} | \sigma^{(\phi^+)}][\sigma^{(\phi^+)}] \times \\
 & [\alpha^{(\eta^-)}][\beta^{(\eta^-,\mu)}] \prod_{y=1}^{n_y} [\epsilon_y^{(\eta^-)} | \sigma^{(\eta^-)}][\sigma^{(\eta^-)}] \times \\
 & [\alpha^{(\eta^+)}][\beta^{(\eta^+,\mu)}] \prod_{y=1}^{n_y} [\epsilon_y^{(\eta^+)} | \sigma^{(\eta^+)}][\sigma^{(\eta^+)}] \times \\
 & [\alpha^{(p)}][\beta^{(p,x)}][\beta^{(p,+)}][\beta^{(p,z)}][\delta].
 \end{aligned}$$

## 785 Appendix B: Forward algorithm description

786 Parameter estimation for this model is made somewhat difficult by the presence of discrete  
 787 parameters (hidden states). We address this issue by using the forward algorithm, which  
 788 does not require sampling from the discrete state space, to compute the joint probability  
 789 of hidden states and observations (Zucchini et al. 2016). To describe this algorithm,  
 790 we first consider the case of one individual. We would like to compute  $[u_{i,1:n_t}, o_{i,1:n_j} | \dots]$   
 791 (suppressing dependence on detection and transition parameters for compactness) for the  
 792 individual with state and capture history shown in Figure 1.

793 We can factor this joint probability as follows:

$$[u_{i,1:n_t}, o_{i,1:n_j}] = [u_{i,1}][u_{i,2}|u_{i,1}][u_{i,3}|u_{i,2}][o_{i,j=1}|u_{i,3}][o_{i,j=2}|u_{i,3}][u_{i,4}|u_{i,3}] \dots [u_{i,n_t}|u_{i,n_t-1}][o_{i,n_j}|u_{i,n_t}].$$

794 If all of the unknown states were known, this would be as simple as extracting the relevant  
 795 probabilities from  $\Psi_{i,t}$  and  $\Omega_{i,j}$ . Assuming that all individuals in the first primary period  
 796 are in the “not recruited” class ( $u_{i,1} = 1 \forall i$ ) implies that  $[u_{i,1}] = (1\ 0\ 0\ 0)$ , where each  
 797 element in the row vector represents the probability of being in hidden state 1, 2, 3, and  
 798 4, respectively. If we define:  $\mathbf{P}(o_{i,j}) = \text{diag}(\Omega_{i,j,o_{i,j}})$  to be the square matrix acquired by  
 799 placing the elements of column  $o_{i,j}$  from  $\Omega_{i,j}$  along the diagonal (with zeros elsewhere),  
 800 the forward algorithm provides the joint distribution of hidden states and observations as  
 801 follows:

$$[u_{i,1:n_t}, o_{i,1:n_j}] = [u_{i,t=1}] \Psi_{i,t=1} \Psi_{i,t=2} \mathbf{P}(o_{i,j=1}) \mathbf{P}(o_{i,j=2}) \Psi_{i,t=2} \dots \Psi_{i,t=n_t-1} \mathbf{P}(o_{i,j=n_j}) \mathbf{1}'$$

802 where  $\mathbf{1}'$  is a column vector of ones. More generally, we can compute this probability by  
 803 defining  $\mathbf{B}_{i,t} = \Psi_{i,t-1} \prod_{j \sim t} \mathbf{P}(o_{i,j})$ , where  $j \sim t$  indicates surveys that took place in primary  
 804 period  $t$  (if no surveys took place, then  $\mathbf{B}_{i,t} = \Psi_{i,t-1}$ ). Then bringing back dependence on  
 805 all other detection and transition parameters into our notation, we can compute the joint  
 806 probability of hidden states and the observation history compactly as:

$$[u_{i,1:n_t}, o_{i,1:n_j} | \theta^{(\lambda)}, \theta^{(\gamma)}, \theta^{(\phi)}, \theta^{(\eta)}, \theta^{(p)}, z_{i,1:n_t}] = [u_{i,t=1}] \prod_{t=2}^{n_t} \mathbf{B}_{i,t} \mathbf{1}'.$$
